## **A Decade's Experience Performing Forensic Medical and Psychologic Evaluations for Pediatric Asylum Seekers in the United States**

Marina Plesons MPH <sup>1</sup>, Haley Hullfish MD<sup>1</sup>, Priyashma Joshi BA<sup>1</sup>, Stephen Symes MD<sup>1</sup>, Anjali  
Saxena MD<sup>1</sup>

1. University of Miami Miller School of Medicine, Miami, FL, USA

### **Corresponding Author:**

Priyashma Joshi, BA

University of Miami Miller School of Medicine, Miami, FL, USA

1120 NW 14th St#1258, Miami, FL 33136

E-mail: [p.joshi@med.miami.edu](mailto:p.joshi@med.miami.edu)

Phone: 804-822-0063

Conflict of interest: None declared

Funding: None declared

Key words: Pediatric, guardian, refugee, asylum, immigration

# 1 **Abstract**

## 2 **Background**

3 The number of children seeking asylum in the US has increased substantially in recent years. To  
4 add to the limited evidence base related to children seeking asylum in the US, this paper  
5 describes the sociodemographic characteristics, nature of human rights violations,  
6 and guardianship status of the children served by the Human Rights Clinic of Miami from 2010-  
7 2021.

## 8 **Methods**

9 A retrospective study was conducted on affidavits for pediatric patients seeking forensic medical  
10 and psychological evaluation at the Human Rights Clinic of Miami from 2010 to 2021. We  
11 determined trends among sociodemographic characteristics and the nature of human rights  
12 violations among these patients and used logistic regression to determine factors associated with  
13 having a guardian present at the evaluation.  
14

## 15 **Results**

16 Of the total 64 pediatric patients who received a forensic medical and psychological evaluation,  
17 over half were male (56%) and two-thirds were aged 15-17. Honduras was the most common  
18 country of origin (53%). Physical violence was the most reported human rights abuse (72%)  
19 followed by gang violence (53%), sexual violence (22%), and political violence (3%). The  
20 majority of children (87%) reported being detained at the border upon entry into the USA. Only  
21 31% of pediatric patients had a guardian present during the evaluation, with guardianship  
22 significantly less likely for older patients ( $p < 0.05$ ).  
23

## 24 **Conclusions**

25 These findings identified specific challenges unique to the pediatric population, including lack of  
26 guardianship among older children. Future efforts may include the development of formal  
27 pediatric-specific guidelines for conducting evaluations of children seeking asylum.  
28  
29  
30

## 31 **Introduction**

32 In 2022, over 300,000 children were arrested by border patrol at the United States (US)-Mexico  
33 border, representing a five-fold increase since 2008 [1]. Furthermore, there was a seventeen-fold  
34 increase in the number of unaccompanied children encountered by border control officers between  
35 2008 and 2019 [2].

36  
37 Many of these individuals come to the US to seek asylum due to persecution or fear of persecution  
38 due to their race, gender, religion, nationality, membership in a particular social group, and/or  
39 political opinion. Although the odds of being granted asylum are strongly affected by the quality  
40 of their legal representation and by the immigration judge to which they are assigned, the US  
41 government does not provide an attorney for individuals seeking asylum [3, 4]. For example, the  
42 percent of applications that were granted asylum in Miami from 2017-2022 ranged from 0.9% to  
43 27.9% based on which judge presided over the case [5]. The number of pending immigration cases  
44 has also increased six-fold in the past ten years, totaling nearly 2 million in 2022, with an average  
45 wait time of 795 days [6].

46  
47 Forensic medical and psychological evaluations by health professionals that corroborate claims of  
48 persecution increase an individual's likelihood of being granted asylum [7-13]. During these  
49 evaluations, health professionals assess the individual's overall health and identify signs and  
50 symptoms of human rights abuse, and then summarize this evidence in an affidavit to be used in  
51 court in the individual's application for asylum. In 1994, the Office of the High Commissioner for  
52 Human Rights published the *Istanbul Protocol: Manual on the Effective Investigation and*  
53 *Documentation of Torture and Other Cruel, Inhuman or Degrading Treatment or Punishment,*

54 later updated in 2004 and 2022, to guide health professionals on conducting such evaluations [14].  
55 Various manuals, guidelines, and toolkits have been established since then to provide additional  
56 support to health professionals [15-19].

57

58 Most of these resources focus on adults but recent preliminary efforts have been made to develop  
59 specific guidance on conducting forensic evaluations for children [20, 21]. However, there is a  
60 need for more involvement from the limited medical community involved in this work, as there is  
61 lack of consensus on issues such as the impact of trauma on pediatric development and best  
62 practices for minimizing re-traumatization of children during the evaluation process [22].  
63 Likewise, a national survey conducted in 2020 identified only 28 providers who reported  
64 performing humanitarian relief evaluations for children seeking asylum in the USA, pointing to  
65 the pressing need to train more health professionals in the forensic evaluation of children [22].

66

67 The Human Rights Clinic of Miami is an independent collection of medical students, residents,  
68 and attending physicians who provide impartial medical and psychological evaluations for asylum  
69 seekers in the US. As of November 2022, Miami-Dade County had 105,316 residents with pending  
70 immigration court deportation cases, the most of any US city [23]. The percentage of applications  
71 granted asylum in Miami is consistently below the national average; it decreased from a high of  
72 41.5% in 2012 to 8.5% in 2020 and increased again to 24.8% in 2022 (Fig 1) [24].

73

74 This paper seeks to add to the limited evidence base regarding forensic medical and psychological  
75 evaluations of children seeking asylum by describing the sociodemographic attributes and

76 guardianship status of the children served by the Human Rights Clinic of Miami from 2010-2021  
77 so that physicians are better able to assess this population in the future.

78

## 79 **Methods**

80 A retrospective chart review was conducted of all affidavits prepared by the Human Rights Clinic  
81 of Miami for pediatric patients from 2010 – 2021. Consent for use of their information in research  
82 activities conducted by the Human Rights Clinic of Miami was sought from participants’  
83 parents/guardians at the time of their evaluation, as was assent from the participants themselves.  
84 Before 2020, this consisted of written consent. In 2020 and 2021, this consisted of oral consent as  
85 evaluations were conducted via Zoom due to restrictions related to the COVID-19 pandemic; oral  
86 consent was witnessed and documented by at least two other staff members of the Human Rights  
87 Clinic of Miami. Data was accessed in January and February 2022 and was organized using  
88 REDCap electronic data capture tools hosted at the University of Miami. During data collection,  
89 the authors had access to information that could identify individual participants; however, efforts  
90 were made to ensure the privacy of this information and this information was not extracted from  
91 the source. Statistical analyses were performed using SPSS (IBM Corp. Released 2021).  
92 Descriptive statistics were used to describe the sociodemographic characteristics and nature of  
93 human rights violations of the children who received services from the Human Rights Clinic of  
94 Miami, and logistic regression was used to identify factors associated with the likelihood of  
95 children having a guardian present during the medical and psychological evaluation.

96

## 97 **Results**

98 From 2010-2021, the Human Rights Clinic of Miami conducted 64 forensic medical and  
 99 psychological evaluations for pediatric patients, constituting 17% of the evaluations conducted by  
 100 the Clinic during that time (Table 1). Just over half of the children were male (56%). Two-thirds  
 101 of the children were 15-17 years old, one-quarter were 11-14 years old, and 6% were 5-10 years  
 102 old; no children were less than 5 years old. Honduras was the most common country of origin  
 103 (53%), followed by Guatemala (28%) and El Salvador (16%). The majority of pediatric patients  
 104 reported achieving some primary (elementary) school in their country of origin (63%), while 29%  
 105 reported achieving some secondary (high) school, and 8% reported receiving no education.

106 **Table 1. Demographics of the Pediatric Patients at the Human Rights Clinic of Miami**

| Characteristic                             | N  |                                  | Frequency (n) | Percentage (%) |
|--------------------------------------------|----|----------------------------------|---------------|----------------|
| Gender                                     | 64 | Female                           | 28            | 43.8           |
|                                            |    | Male                             | 36            | 56.3           |
| Age (years)                                | 64 | <5                               | 0             | 0              |
|                                            |    | 5-10                             | 4             | 6.3            |
|                                            |    | 11-14                            | 17            | 26.5           |
|                                            |    | 15-17                            | 43            | 67.2           |
| Race                                       | 6  | Black                            | 2             | 33.3           |
|                                            |    | Indigenous                       | 4             | 66.6           |
| Ethnicity                                  | 62 | Hispanic                         | 62            | 100            |
| Country of origin                          |    | El Salvador                      | 10            | 15.6           |
|                                            |    | Guatemala                        | 18            | 28.1           |
|                                            |    | Haiti                            | 1             | 1.6            |
|                                            |    | Honduras                         | 34            | 53.1           |
|                                            |    | United States of America         | 1             | 1.6            |
| Highest level of education in home country | 52 | None                             | 4             | 7.7            |
|                                            |    | Some primary (elementary) school | 33            | 63.5           |
|                                            |    | Some secondary (high) school     | 15            | 28.8           |
| Type of human rights abuse                 | 64 | Gang                             | 34            | 53.1           |
|                                            |    | Political                        | 2             | 3.1            |
|                                            |    | Physical violence                | 46            | 71.9           |
|                                            |    | Sexual violence                  | 14            | 21.9           |
|                                            |    | Other                            | 1             | 1.6            |
| Detained at the border                     | 37 | Yes                              | 32            | 86.5           |

|                                                              |    |        |    |      |
|--------------------------------------------------------------|----|--------|----|------|
|                                                              |    | No     | 5  | 13.5 |
| Number of people in house                                    | 50 | <5     | 32 | 64.0 |
|                                                              |    | 5-10   | 17 | 34.0 |
|                                                              |    | >10    | 1  | 2.0  |
| Relations with people in home                                | 52 | Family | 50 | 96.2 |
|                                                              |    | Mixed  | 2  | 3.8  |
| Currently in school                                          | 50 | Yes    | 48 | 96.0 |
|                                                              |    | No     | 2  | 4.0  |
| Speaks English                                               | 51 | Yes    | 14 | 27.5 |
|                                                              |    | No     | 37 | 72.5 |
| Guardian present during medical and psychological evaluation | 58 | Yes    | 18 | 31.0 |
|                                                              |    | No     | 40 | 69.0 |
| Guardian relationship                                        | 18 | Mother | 15 | 83.3 |
|                                                              |    | Father | 1  | 5.6  |

107

108 Regarding the human rights abuses that the children experienced in their country of origin, physical  
 109 violence was most reported (72%), followed by gang violence (53%), sexual violence (22%), and  
 110 political violence (3%). When disaggregated by gender (Fig 2), more boys reported experiencing  
 111 gang violence than girls, while nearly all those who reported experiencing sexual and political  
 112 violence were girls. Physical violence was reported by roughly the same number of boys and girls.  
 113 When disaggregated by age (Fig 3), 5-10-year-olds reported experiencing physical violence most  
 114 commonly, followed by gang violence; no 5-10-year-olds reported experiencing sexual or political  
 115 violence. Most of those reporting sexual violence were 15-17 years of age.

116

117 The majority of children (87%) reported being detained at the border upon entry into the USA.  
 118 Regarding their current conditions in Miami, 64% reported living in a home with fewer than 5  
 119 people, while 34% reported living in a home with 5-10 people. Approximately all the children  
 120 (96%) were currently attending school, but nearly three-quarters (73%) reported they did not speak  
 121 English.

122

123 Only one in three pediatric patients (31%) had a guardian present during the medical and  
124 psychological evaluation. Of the guardians present, the majority were mothers (83%), followed by  
125 siblings (11%) and fathers (6%). When disaggregated by age (Fig 4), the percentage of children  
126 with a guardian present decreased from 100% of 5-10-year-olds, to approximately half of 11-14-  
127 year-olds, to only 20% of 15-17-year-olds. A logistic regression was performed to ascertain the  
128 effects of age, gender, and country of origin on the likelihood that a guardian was present. The  
129 model was statistically significant ( $\chi^2(6) = 16.568, p < 0.05$ ), and explained 35.0% (Nagelkerke  
130 R<sup>2</sup>) of the variance in guardianship, correctly classifying 79.3% of cases. Increasing age was  
131 associated with a decreased likelihood of having a guardian present. Neither gender nor country  
132 of origin were significant predictors.

133

## 134 **Discussion**

135 In the last decade, there has been a substantial rise in unaccompanied children entering the USA  
136 [2]. Children seeking asylum present with a distinct set of physical and psychological needs  
137 compared to their adult counterparts. Unfortunately, there are still very few resources targeted  
138 towards pediatric asylum seekers [25]. Medical and psychological affidavits are strongly  
139 associated with positive outcomes in asylum cases, especially for children [13]. The Human Rights  
140 Clinic of Miami serves this population by providing such affidavits for their asylum cases, as well  
141 as medical and psychological referrals and linkage to relevant social services. Over the past ten  
142 years, pediatric patients have constituted nearly 20% of the total patients served by the Human  
143 Rights Clinic of Miami. Therefore, it is vital that we understand their unique demographics and  
144 needs to develop standardized and optimized procedures that cater specifically to this vulnerable  
145 population.



146 The type of violence encountered by pediatric patients in the Human Rights Clinic creates a strong  
147 argument for asylum. Our data demonstrate that most pediatric patients encountered physical  
148 violence, followed by gang, sexual, and political violence. When considering gender, both male  
149 and female pediatric patients were equally vulnerable to physical violence, but males experienced  
150 more gang violence, while females experienced more sexual and political violence. Regarding age,  
151 children aged 5–10 years were more likely to experience physical violence, while those aged 15–  
152 17 years were more likely to experience sexual violence. This demographic data can inform health  
153 professionals on how to appropriately screen patients based on their gender and age group. Given  
154 the frequency of sexual violence in female adolescent patients for example, screenings in this  
155 population should incorporate questions on sexual violence regardless of their documented history.

156

157 This study also provides valuable insight into factors associated with guardianship of children  
158 seeking asylum. For children under 18 years old, the Human Rights Clinic of Miami always  
159 requests that a legal guardian be present for the evaluation to help to advocate on the child’s behalf,  
160 provide emotional support, protect patient autonomy, and fill in gaps in the story. Evaluations  
161 commonly involve triggering discussions of violence, abuse, and trauma, so it is crucial to have a  
162 guardian present. Furthermore, pediatric patients may not remember or be able to accurately  
163 describe relevant details about their experiences, especially those that occurred when they were  
164 very young; in such cases, a guardian can help by providing supplementary information. However,  
165 it is often difficult for guardians to attend the evaluation for various reasons, including work,  
166 childcare, and financial restraints; additionally, many children traveled to the US as  
167 unaccompanied minors and are in various stages of the process of being receiving a court-  
168 appointed guardian. Therefore, evaluations often must proceed without a guardian present, as the

169 benefit of completing the medical and psychological evaluation in the legal time frame of their  
170 asylum case takes precedence. As demonstrated by this study, only 31% of the HRC’s pediatric  
171 patients had a guardian present at their evaluation. Older age was associated with not having a  
172 guardian present, as most 15–17-year-olds were not accompanied by a guardian. As such,  
173 guardianship demonstrates a unique problem in the evaluation of children seeking asylum that  
174 must be addressed in a more concerted manner in the future. This could include obtaining consent  
175 from a guardian before the evaluation or over the phone at the time of evaluation, obtaining assent  
176 from the child, working with the patient and lawyer further in advance of the evaluation to ensure  
177 a guardian is present, and identifying other sources of support for our patients so they can receive  
178 the care they need.

179  
180 This study was conducted at a single clinic with a limited number of pediatric evaluations; as such,  
181 it presents certain limitations. Miami has a unique immigrant and asylee population, with most  
182 individuals originating from Central and South America; therefore, the results of this study may  
183 not be generalizable to the entire US. More data is necessary to place the demographic trends of  
184 pediatrics patients of the Human Rights Clinic of Miami with those served by other institutions  
185 and individuals across the country. In addition, as it is run by students at the University of Miami  
186 Miller School of Medicine, the staff of the Human Rights Clinic of Miami turn over each year;  
187 therefore, several students have inputted data into its record-keeping system over the last decade.  
188 This leads to inconsistent data input, although the data collection is standardized through REDCap.

189

## 190 **Conclusions**

191 The Human Rights Clinic of Miami aims to provide medical and psychological evaluations for  
192 individuals seeking asylum in the US, while protecting their autonomy and safety. The latter goal  
193 is especially emphasized when evaluating children, a vulnerable population with unique needs.  
194 This study established the demographics of the pediatric patients seen by the Human Rights Clinic  
195 of Miami over the last ten years and identified specific challenges unique to the pediatric  
196 population. Future research may investigate whether factors such as guardianship affect the  
197 outcome of the asylum case, and future efforts may include the development of formal pediatric-  
198 specific guidelines for conducting medical and psychological evaluations of children seeking  
199 asylum.

## 200 **Acknowledgements**

201 We thank the staff members of the Human Rights Clinic of Miami for their efforts in conducting  
202 evaluations for the clinics, members of the legal team working concurrently with the HRC, and  
203 most importantly, the patients and their family members for sharing their stories.

204

## 205 **References**

- 206 1. Border control arrests: Transactional Records Access Clearinghouse (TRAC); 2022.  
207 Available from: <https://trac.syr.edu/phptools/immigration/cbparrest/>.
- 208 2. Growing numbers of children try to enter the US: Transactional Records Access  
209 Clearinghouse (TRAC); 2022. Available from: <https://trac.syr.edu/immigration/reports/687/>.
- 210 3. Ramji-Nogales J, Schoenholtz AI, Schrag PG. Refugee Roulette: Disparities in Asylum  
211 Adjudication.

- 212 4. The Impact of Nationality, Language, Gender and Age on Asylum Success: Transactional  
213 Records Access Clearinghouse (TRAC); 2021 [December 2022]. Available from:  
214 <https://trac.syr.edu/immigration/reports/668/>.
- 215 5. Judge-by-Judge Asylum Decisions in Immigration Courts: FY 2017-2022: Transactional  
216 Records Access Clearinghouse (TRAC); 2022 [December 2022]. Available from:  
217 <https://trac.syr.edu/immigration/reports/judgereports/>.
- 218 6. Immigration court backlog tool: Transactional Records Access Clearinghouse (TRAC);  
219 2022. Available from: [https://trac.syr.edu/phptools/immigration/court\\_backlog/](https://trac.syr.edu/phptools/immigration/court_backlog/).
- 220 7. Lustig SL, Kureshi S, Delucchi KL, Iacopino V, Morse SC. Asylum grant rates following  
221 medical evaluations of maltreatment among political asylum applicants in the United States. J  
222 Immigr Minor Health. 2008;10(1):7-15. Epub 2007/05/12. doi: 10.1007/s10903-007-9056-8.  
223 PubMed PMID: 17492260.
- 224 8. Peart JM, Tracey EH, Lipoff JB. The Role of Physicians in Asylum Evaluation:  
225 Documenting Torture and Trauma. JAMA Intern Med. 2016;176(3):417. Epub 2016/03/10. doi:  
226 10.1001/jamainternmed.2016.0053. PubMed PMID: 26954057.
- 227 9. Asgary R, Charpentier B, Burnett DC. Socio-medical challenges of asylum seekers prior  
228 and after coming to the US. J Immigr Minor Health. 2013;15(5):961-8. Epub 2012/07/27. doi:  
229 10.1007/s10903-012-9687-2. PubMed PMID: 22833258.
- 230 10. Asgary RG, Metalios EE, Smith CL, Paccione GA. Evaluating asylum seekers/torture  
231 survivors in urban primary care: a collaborative approach at the Bronx Human Rights Clinic.  
232 Health Hum Rights. 2006;9(2):164-79. Epub 2007/02/03. PubMed PMID: 17265759.

- 233 11. McKenzie KC, Bauer J, Reynolds PP. Asylum Seekers in a Time of Record Forced Global  
234 Displacement: the Role of Physicians. *J Gen Intern Med.* 2019;34(1):137-43. Epub 2018/06/17.  
235 doi: 10.1007/s11606-018-4524-5. PubMed PMID: 29907914; PubMed Central PMCID:  
236 PMCPMC6318190.
- 237 12. Scruggs E, Guetterman TC, Meyer AC, VanArtsdalen J, Heisler M. "An absolutely  
238 necessary piece": A qualitative study of legal perspectives on medical affidavits in the asylum  
239 process. *J Forensic Leg Med.* 2016;44:72-8. Epub 2016/09/19. doi: 10.1016/j.jflm.2016.09.002.  
240 PubMed PMID: 27639654; PubMed Central PMCID: PMCPMC5121032.
- 241 13. Atkinson HG, Wyka K, Hampton K, Seno CL, Yim ET, Ottenheimer D, et al. Impact of  
242 forensic medical evaluations on immigration relief grant rates and correlates of outcomes in the  
243 United States. *J Forensic Leg Med.* 2021;84:102272. Epub 2021/11/08. doi:  
244 10.1016/j.jflm.2021.102272. PubMed PMID: 34743036.
- 245 14. Office of the United Nations High Commissioner for Human Rights. Istanbul Protocol:  
246 Manual on the Effective Investigation and Documentation of Torture and Other Cruel, Inhuman  
247 or Degrading Treatment or Punishment. New York and Geneva: United Nations, 2022.
- 248 15. Physicians for Human Rights. Examining Asylum Seekers: A Clinician's Guide to Physical  
249 and Psychological Evaluations of Torture and Ill-Treatment. 2nd Edition ed. Boston: Physicians  
250 for Human Rights; 2012.
- 251 16. Ferdowsian H, McKenzie K, Zeidan A. Asylum Medicine: Standard and Best Practices.  
252 *Health Hum Rights.* 2019;21(1):215-25. Epub 2019/06/27. PubMed PMID: 31239628; PubMed  
253 Central PMCID: PMCPMC6586957

- 254 17. Iacopino V. Medical Evaluations of Asylum Seekers. *AMA Journal of Ethics*.  
255 2004;6(9):401-4. doi: 10.1001/virtualmentor.2004.6.9.cprl1-0409.
- 256 18. Ruchman SG, Green AS, Schonholz S, Hersh E, Sikka N, Baranowski KA, et al. A toolkit for  
257 building medical programs for asylum seekers: Resources from the Mount Sinai Human Rights  
258 Program. *J Forensic Leg Med*. 2020;75:102037. Epub 2020/09/16. doi:  
259 10.1016/j.jflm.2020.102037. PubMed PMID: 32932168.
- 260 19. Peel M, Iacopino V. *The Medical Documentation of Torture*. Cambridge: Cambridge  
261 University Press; 2009.
- 262 20. Ferrera MJ, Giri M. What Should Count as Best Practices of Forensic Medical and  
263 Psychological Evaluations for Children Seeking Asylum? *AMA J Ethics*. 2022;24(4):E267-74. Epub  
264 2022/04/12. doi: 10.1001/amajethics.2022.267. PubMed PMID: 35405052.
- 265 21. Gartland MG, Ijadi-Maghsoodi R, Giri M, Messmer S, Peeler K, Barkoudah A, et al.  
266 Forensic Medical Evaluation of Children Seeking Asylum: A Guide for Pediatricians. *Pediatr Ann*.  
267 2020;49(5):e215-e21. Epub 2020/05/16. doi: 10.3928/19382359-20200421-01. PubMed PMID:  
268 32413149; PubMed Central PMCID: PMC9733959.
- 269 22. Rosenberg J, Edwards E, Wang KH, McKenzie KC, Asnes AG, Young J. Characteristics and  
270 scope of humanitarian relief forensic medical evaluations for immigrant children in the US. *J*  
271 *Forensic Leg Med*. 2021;82:102221. Epub 2021/07/30. doi: 10.1016/j.jflm.2021.102221.  
272 PubMed PMID: 34325082.
- 273 23. Immigration Court Quick Facts: Transactional Records Access Clearinghouse (TRAC);  
274 2022 [December 2022]. Available from: <https://trac.syr.edu/immigration/quickfacts/eoir.html>.

- 275 24. Asylum Decisions: Transactional Records Access Clearinghouse (TRAC); 2022 [December  
276 2022]. Available from: <https://trac.syr.edu/phptools/immigration/asylum/>.
- 277 25. Lynch MA, Cuninghame C. Understanding the needs of young asylum seekers. Arch Dis  
278 Child. 2000;83(5):384-7. Epub 2000/10/21. doi: 10.1136/adc.83.5.384. PubMed PMID:  
279 11040141; PubMed Central PMCID: PMC1718532.
- 280

**Figure 1. Percentage of applicants granted asylum, by fiscal year**

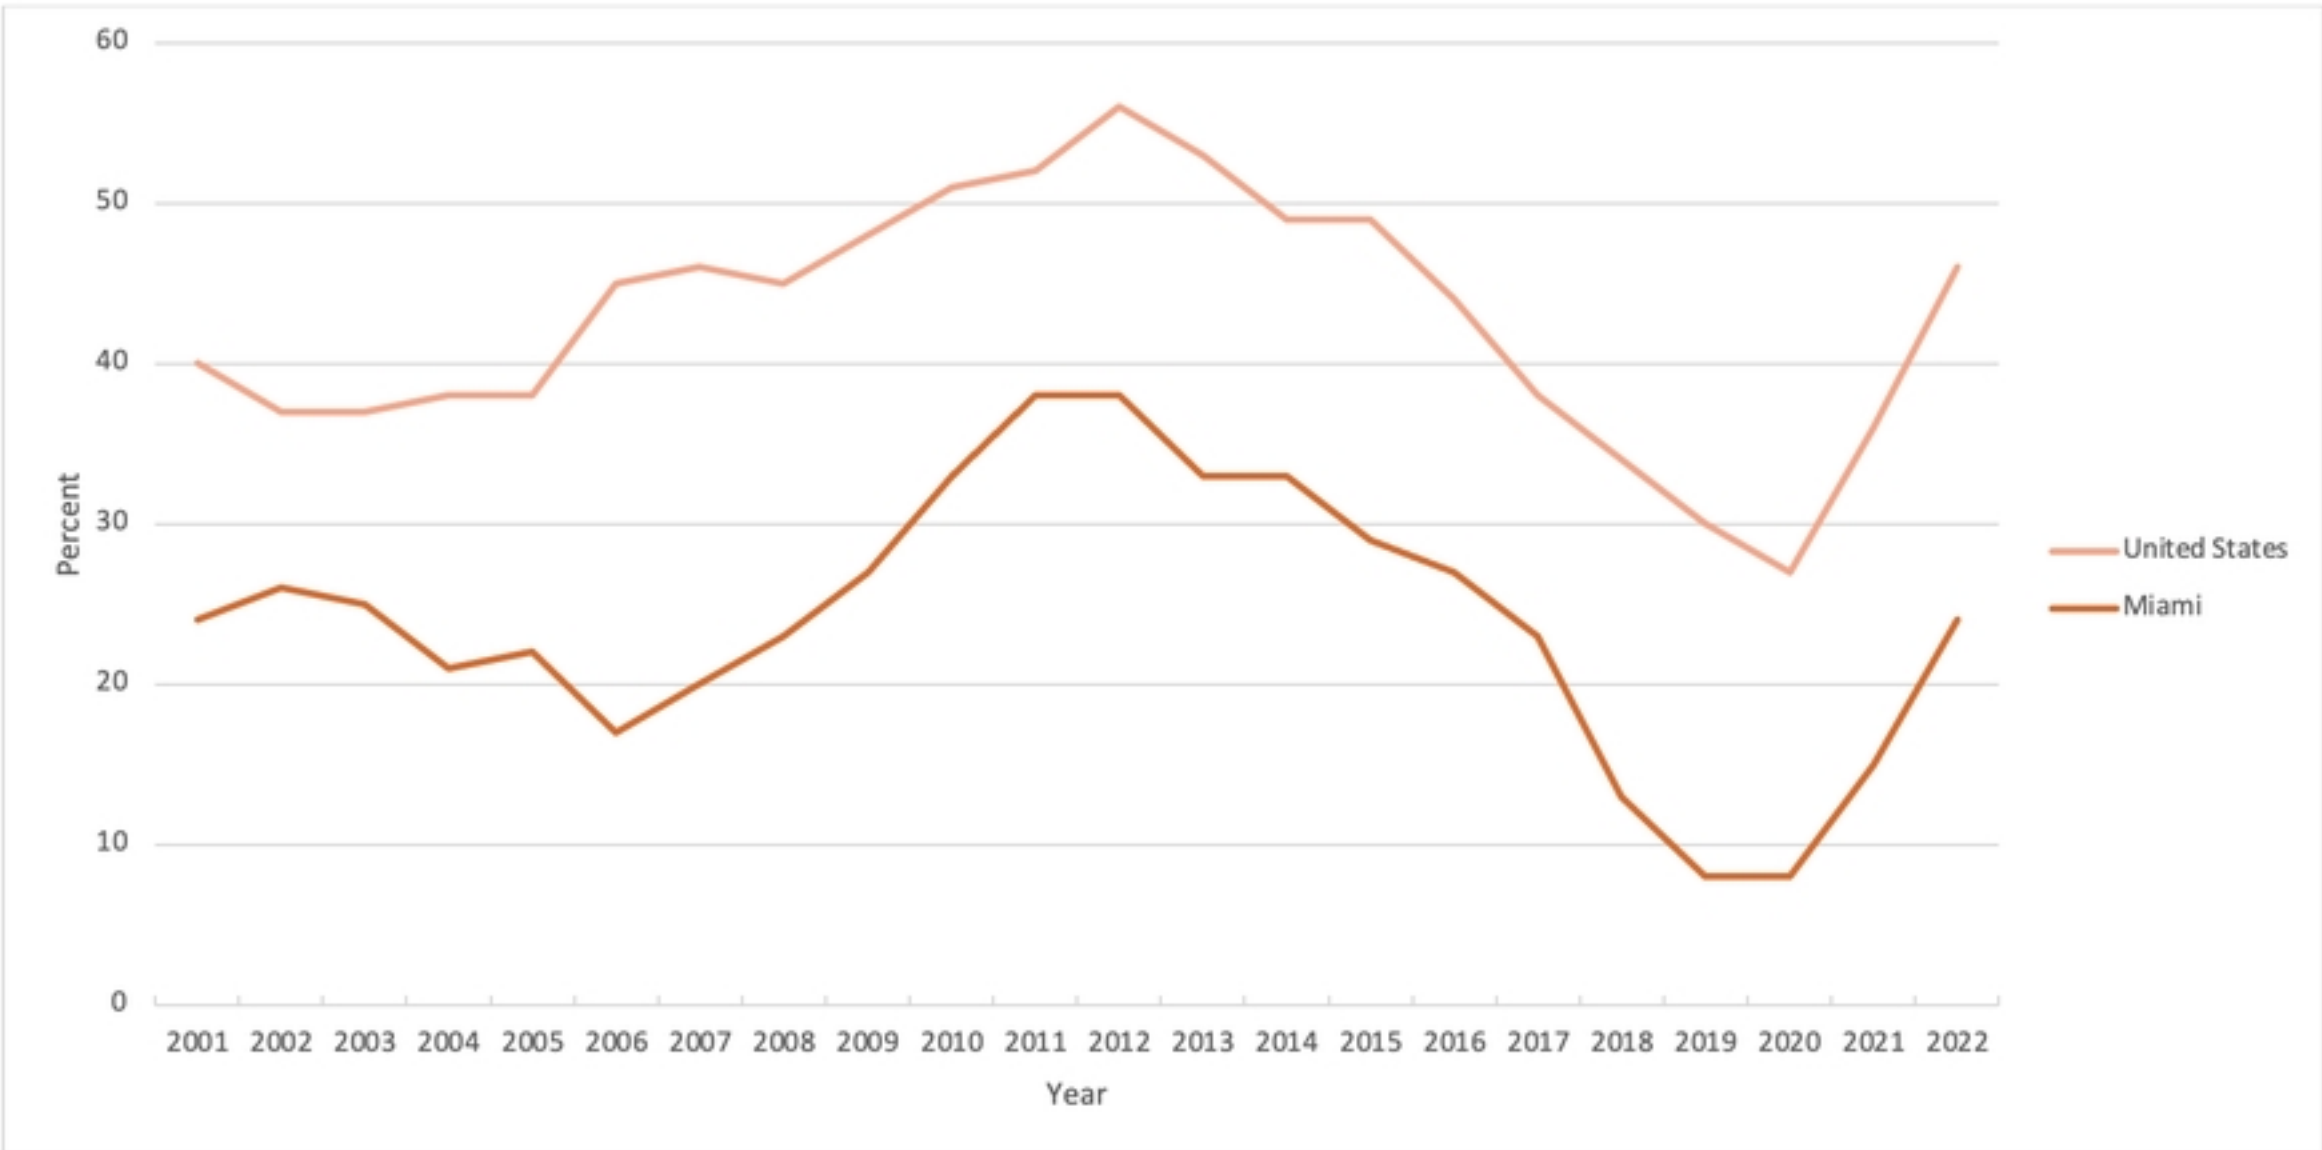

Figure 1



**Figure 2. Type of human rights abuse experienced in country of origin, by gender**

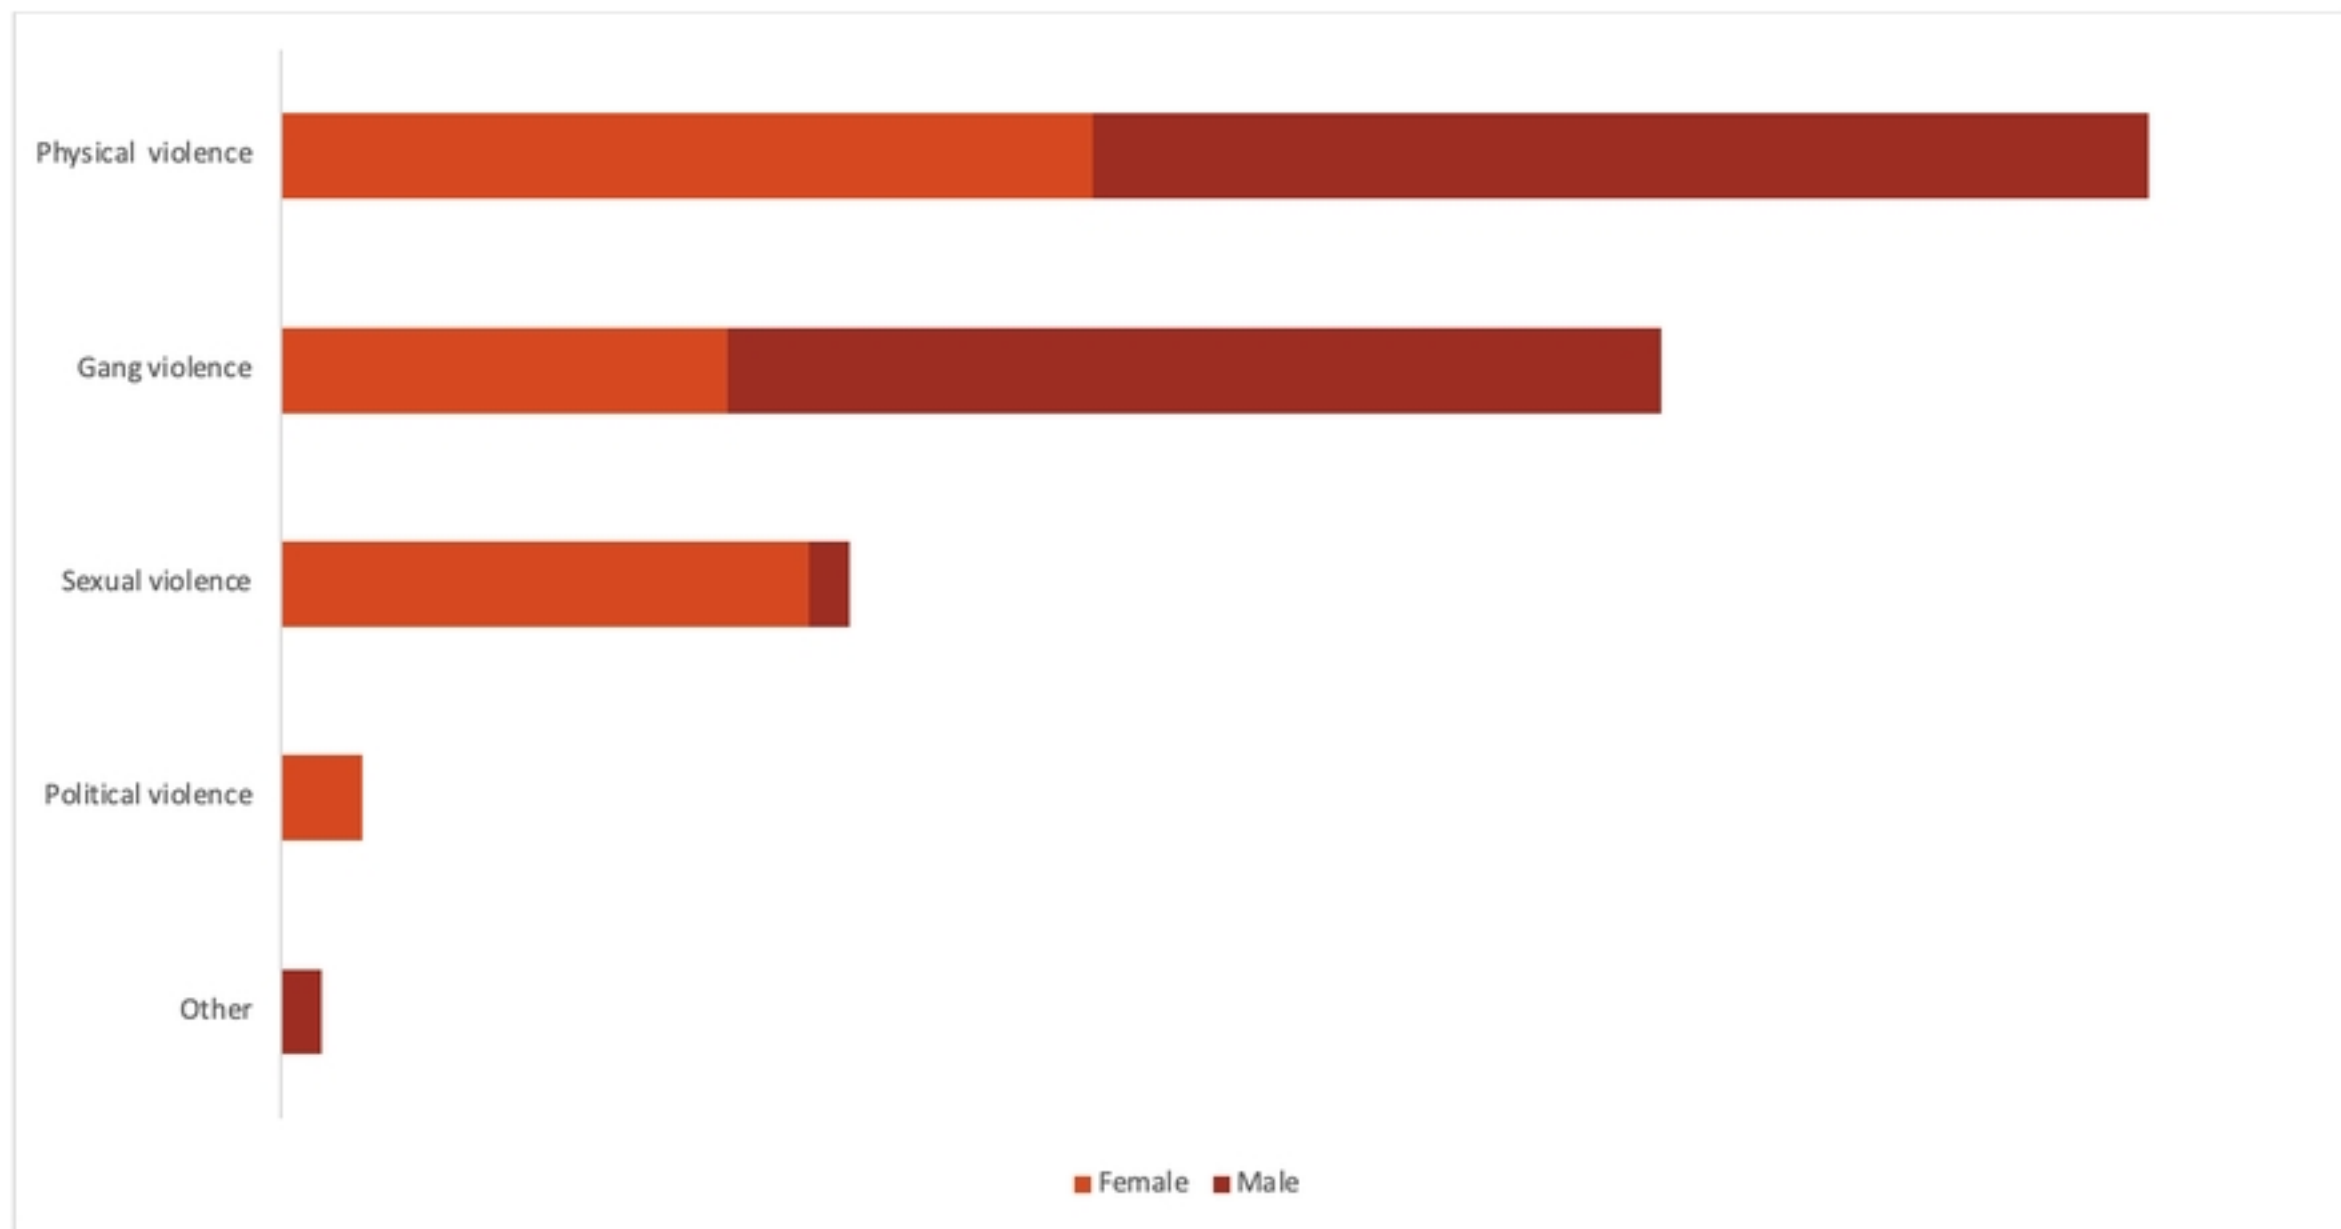

**Figure 2**

**Figure 3. Type of human rights abuse experienced in country of origin, by age**

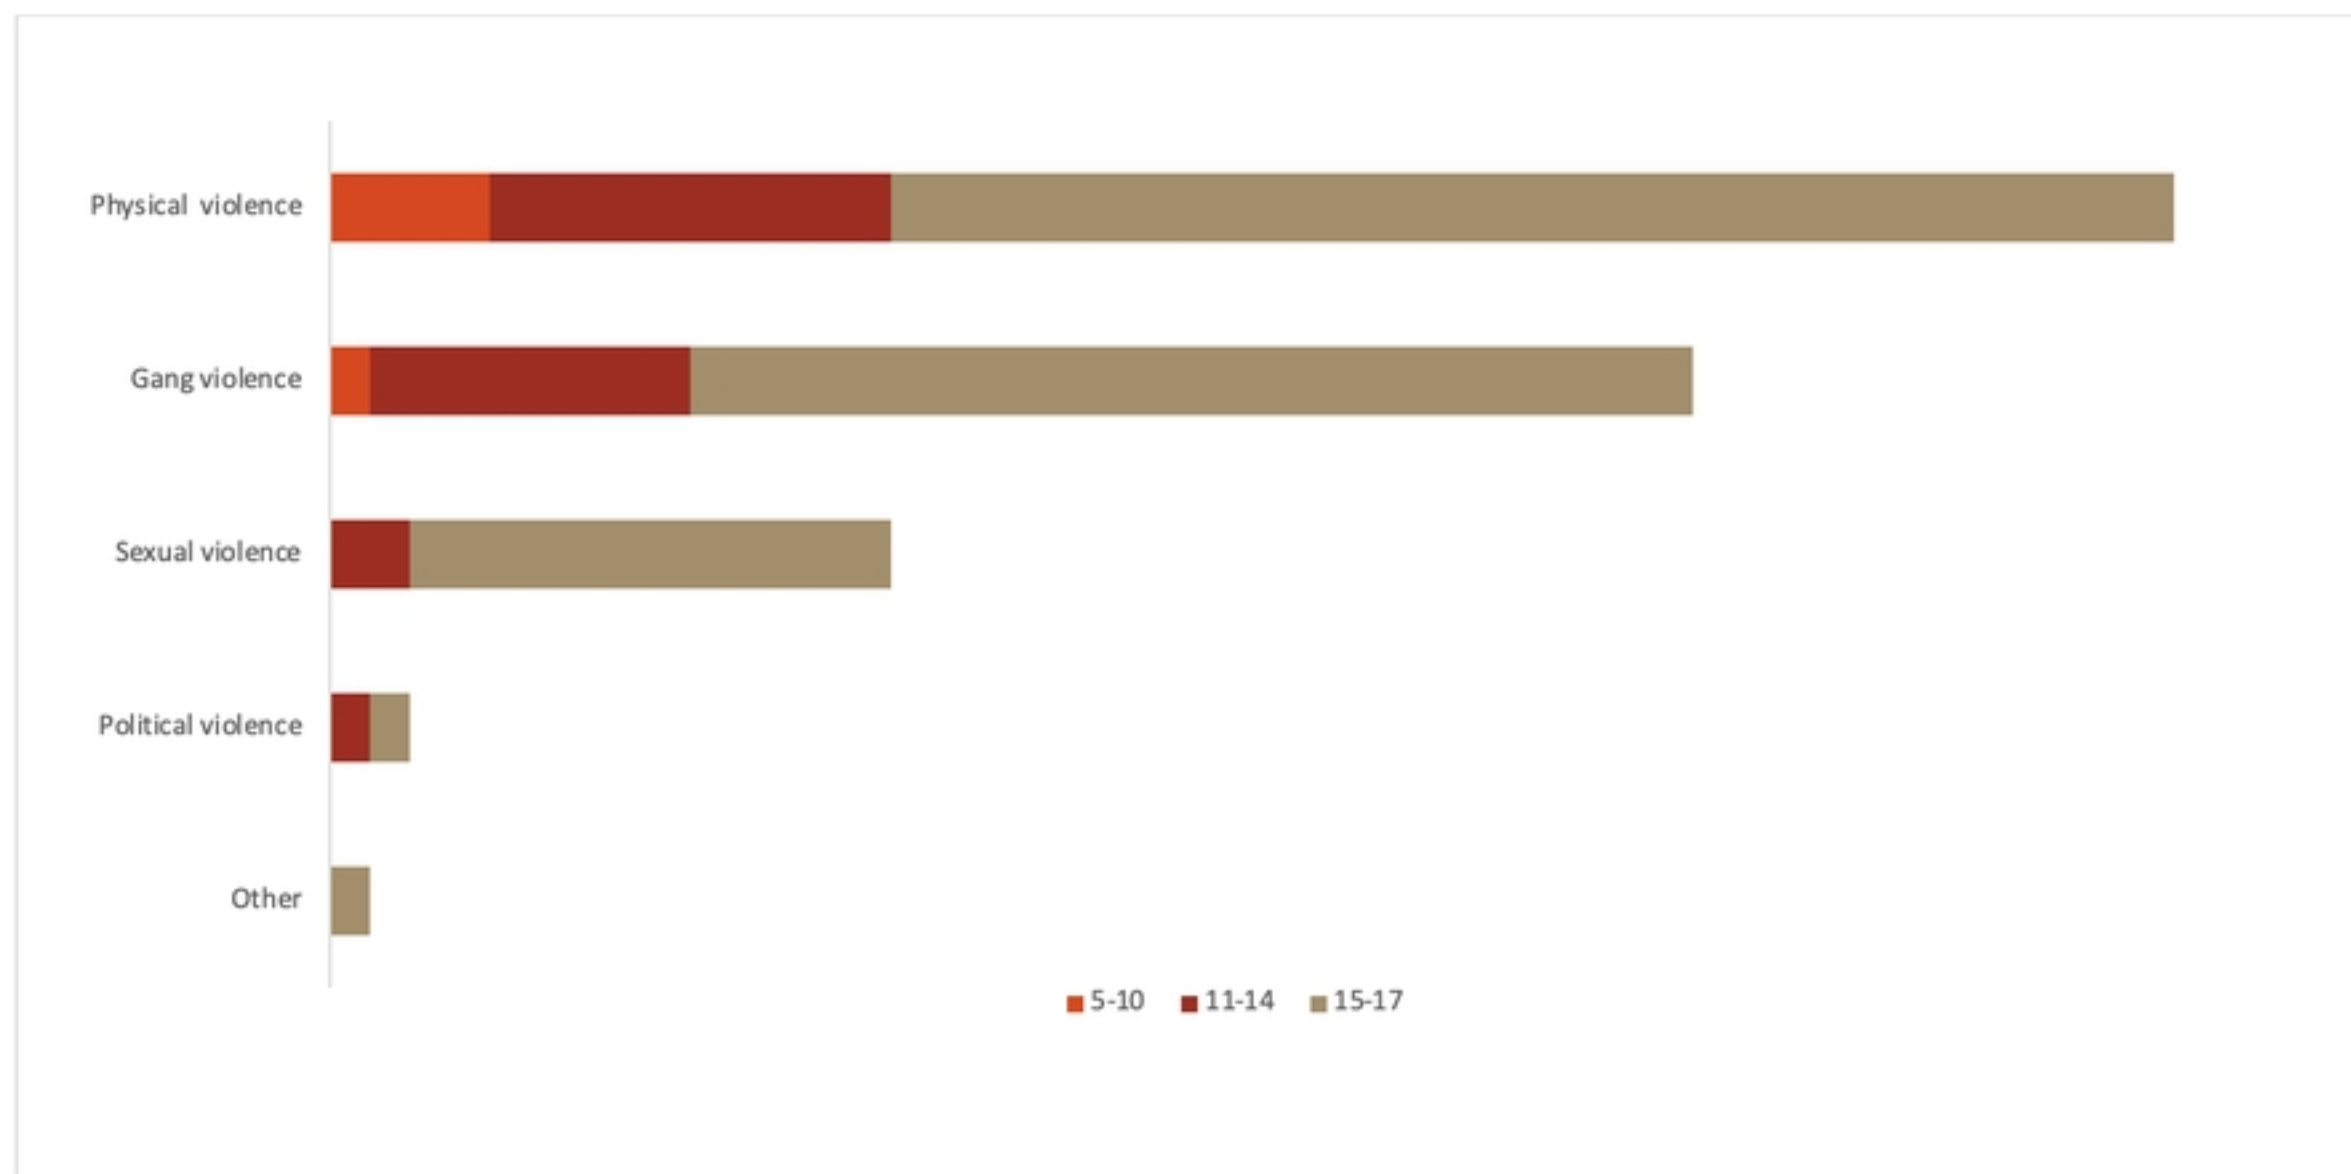

Figure 3

**Figure 4. Guardian present during medical and psychological evaluation, by age**

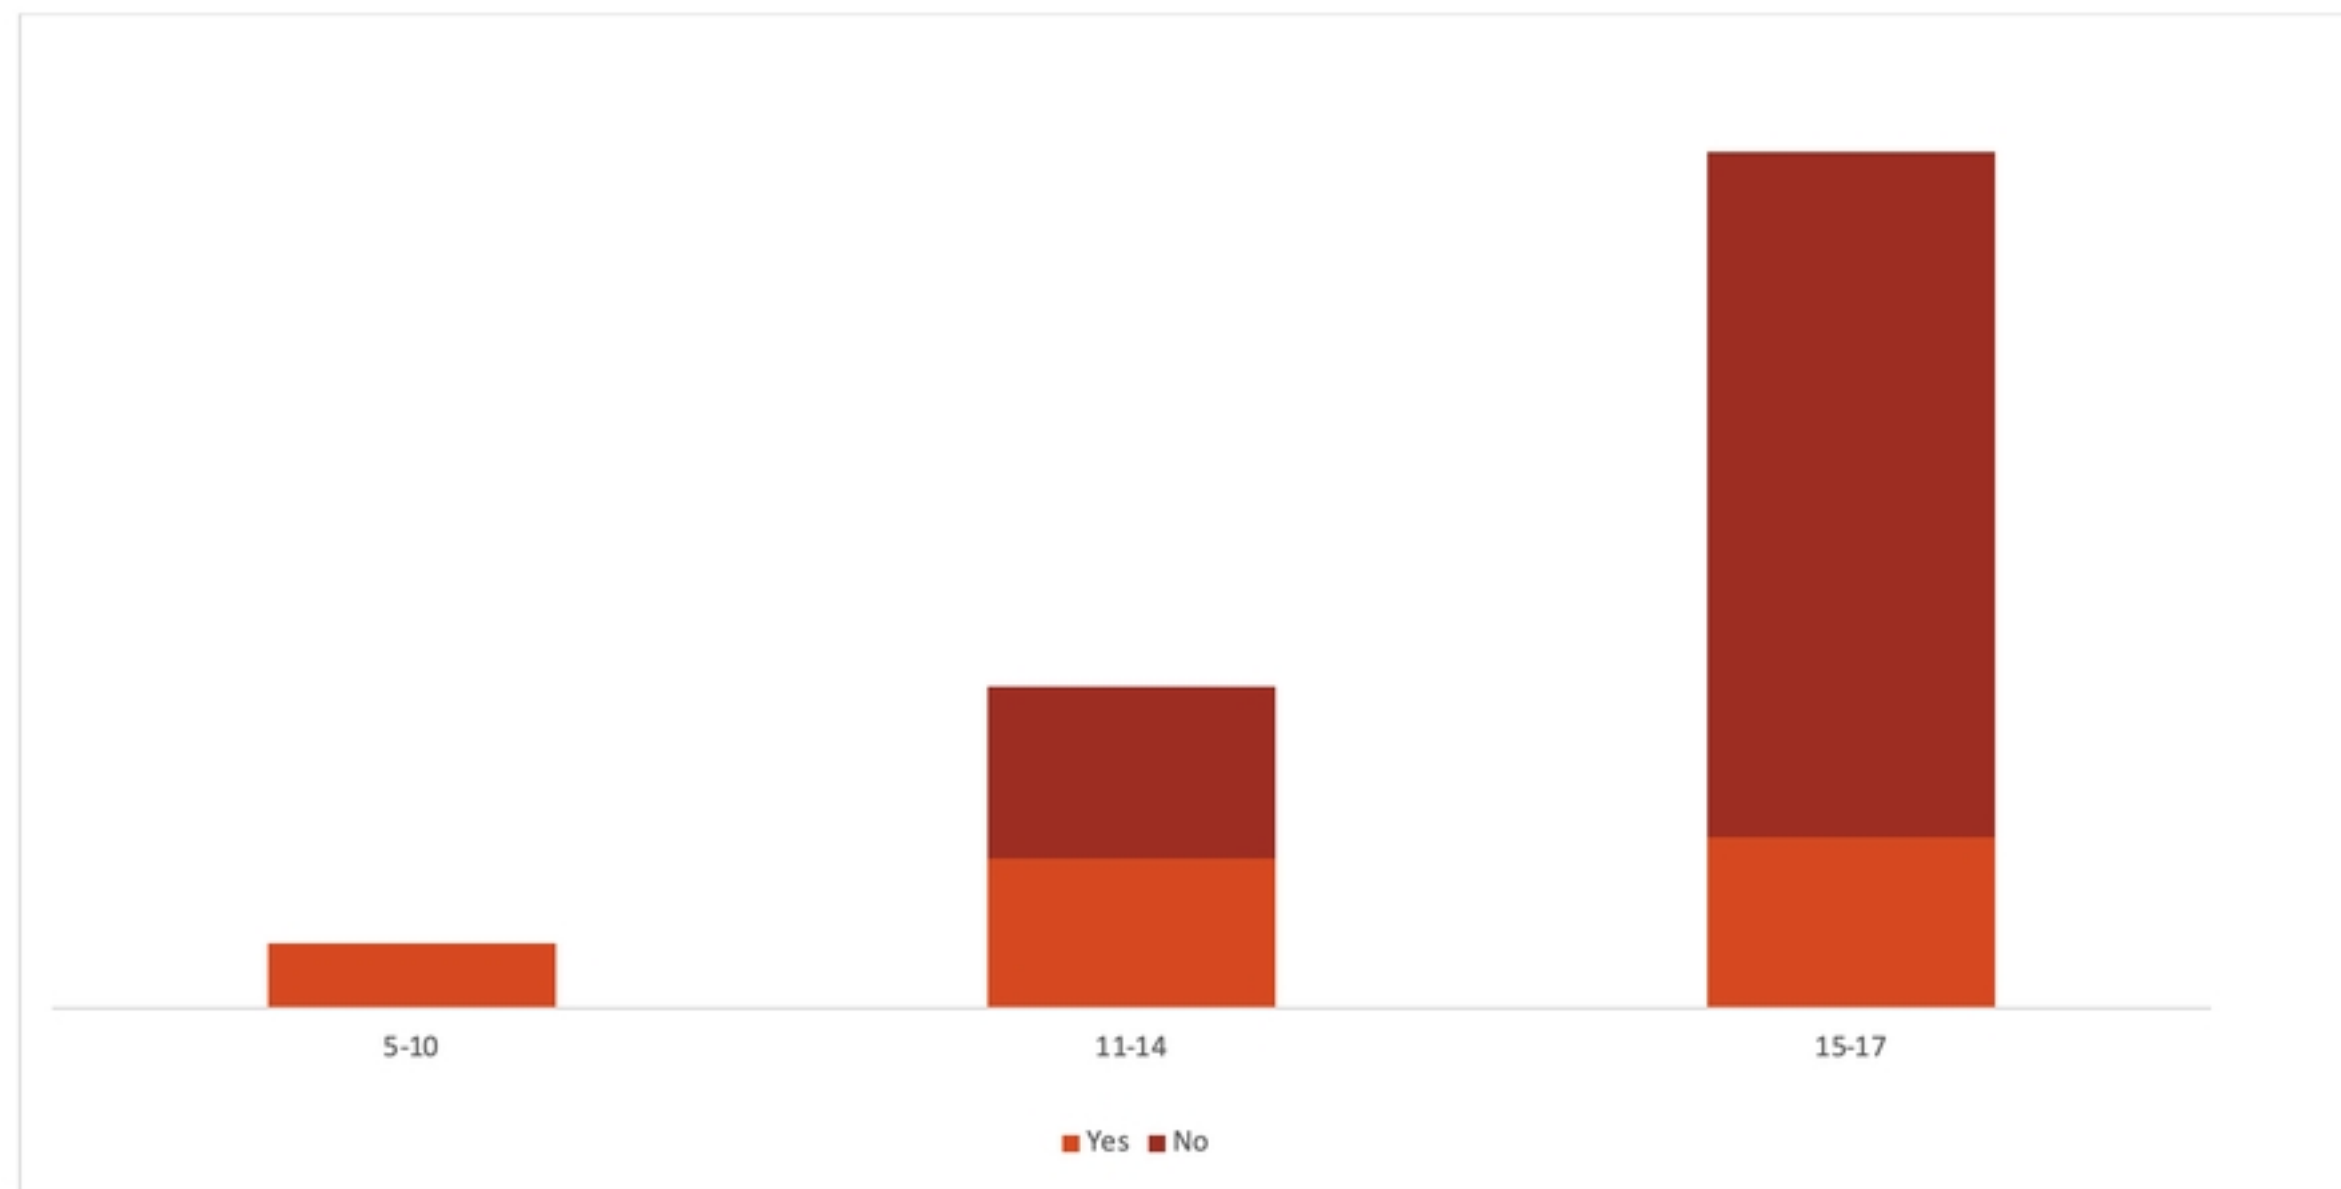

Figure 4
